# Supplementary material for: Effects of Clinical Wastewater on the Bacterial Community Structure from Sewage to the Environment
Source: MDPI journal article supplement (doi:10.3390/microorganisms9040718), 2021-03-31
Supplement: s1 [file s1]

## Supplementary material

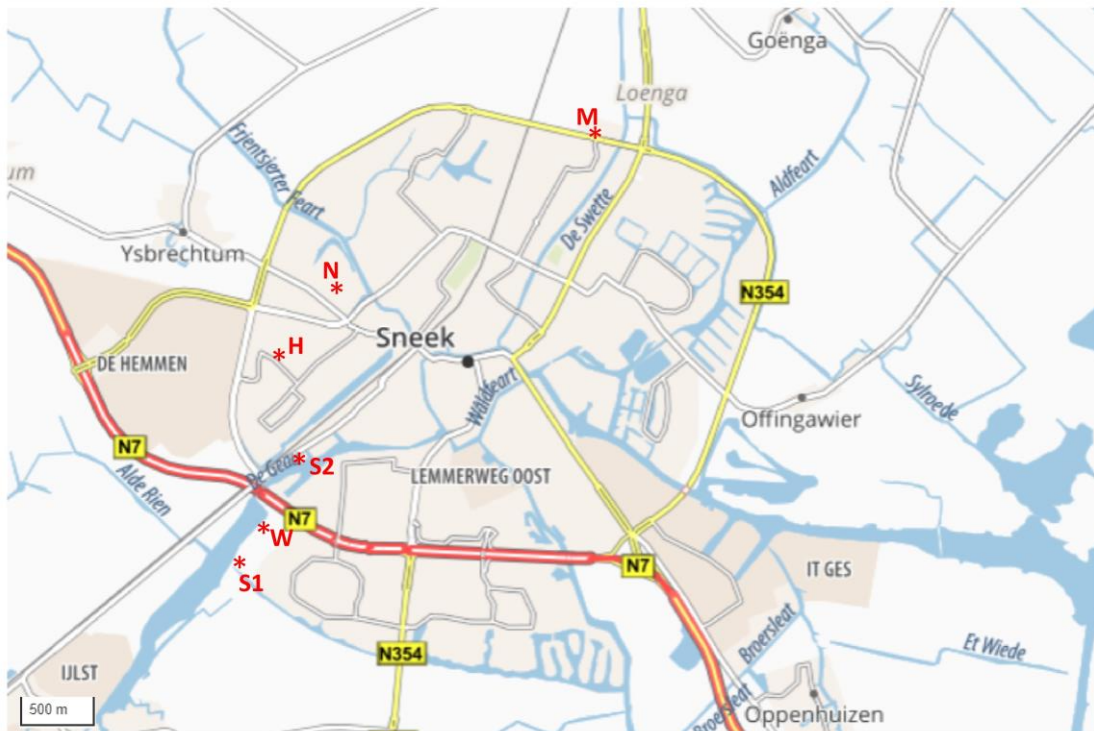

**Figure S1. Locations of the sampling points in Sneek.** H = hospital, N = nursing home, C = community, W = WWTP (influent and effluent), S1 and S2 = Receiving surface water. The location of the control surface water sample is not indicated. The map of Sneek is obtained from [viamichelin.nl](http://viamichelin.nl).

**Table S1a. Statistical analysis of weighted UniFrac distances along the wastewater pathway.** The p-values of the PERMANOVA test are shown below the diagonal (Adjustment method for p-value: FDR), and the permuted p-values using permutation test for homogeneity of multivariate dispersion are shown above the diagonal.

|              | Hospital     | Nursing-home | Community    | Influent     | Effluent |
|--------------|--------------|--------------|--------------|--------------|----------|
| Hospital     | X            | 0.800        | 0.233        | 0.218        | 0.775    |
| Nursing-home | <b>0.001</b> | X            | 0.201        | 0.439        | 0.605    |
| Community    | <b>0.001</b> | <b>0.001</b> | X            | <b>0.010</b> | 0.461    |
| Influent     | <b>0.001</b> | <b>0.001</b> | <b>0.001</b> | X            | 0.115    |
| Effluent     | <b>0.001</b> | <b>0.001</b> | <b>0.001</b> | <b>0.001</b> | X        |

**Table S1b. Statistical analysis of unweighted UniFrac distances along the wastewater pathway.** The p-values of the PERMANOVA test are shown below the diagonal (Adjustment method for p-value: FDR), and the permuted p-values using permutation test for homogeneity of multivariate dispersion are shown above the diagonal.

|              | Hospital     | Nursing-home | Community    | Influent     | Effluent     |
|--------------|--------------|--------------|--------------|--------------|--------------|
| Hospital     | X            | <b>0.014</b> | <b>0.009</b> | <b>0.018</b> | <b>0.001</b> |
| Nursing-home | <b>0.001</b> | X            | 0.554        | 0.684        | <b>0.001</b> |
| Community    | <b>0.001</b> | <b>0.001</b> | X            | 0.970        | <b>0.001</b> |
| Influent     | <b>0.001</b> | <b>0.001</b> | <b>0.001</b> | X            | <b>0.001</b> |
| Effluent     | <b>0.001</b> | <b>0.001</b> | <b>0.001</b> | <b>0.001</b> | X            |

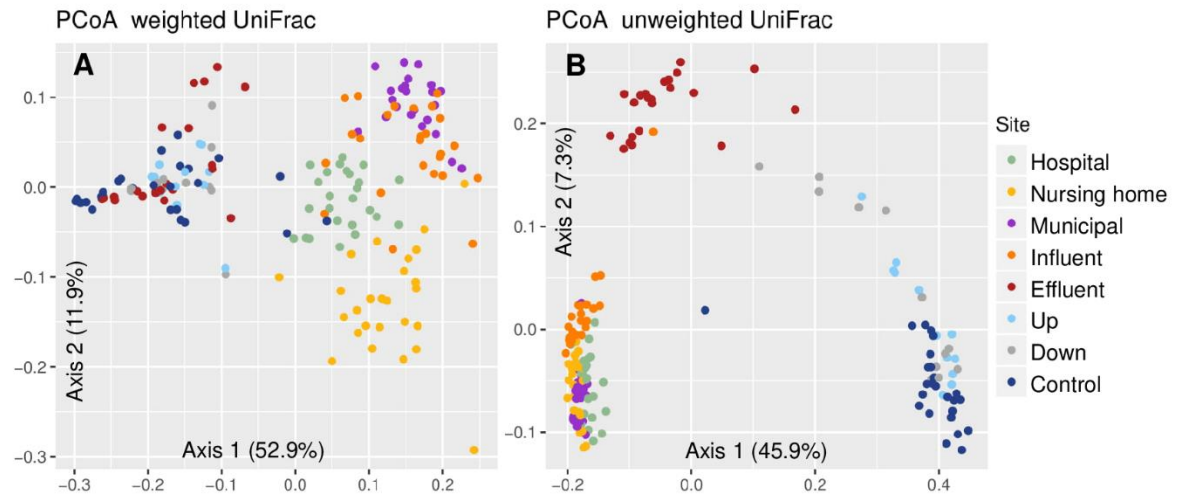

**Figure S2. Bacterial beta diversity off all the locations.** Principal coordinates ordination of different wastewaters based on weighted UniFrac distances (A) and unweighted UniFrac distances (B). 69% of the diversity in bacterial composition and 59% of the diversity in bacterial membership could be explained by the locations. The percentage of variation explained by each axis is shown between parentheses. H = hospital, N = nursing home, C = community, I = influent, E = effluent, Up = upstream surface water, Down = downstream surface water, and Control = control surface water.

**Table S2a. Statistical analysis of weighted UniFrac distances along all the locations.** The p-values of the PERMANOVA test are shown below the diagonal (Adjustment method for p-value: FDR), and the permuted p-values using permutation test for homogeneity of multivariate dispersion are shown above the diagonal.

|              | Hospital     | Nursing-home | Community    | Influent     | Effluent     | Up-stream    | Down-stream | Control      |
|--------------|--------------|--------------|--------------|--------------|--------------|--------------|-------------|--------------|
| Hospital     | X            | 0.784        | 0.219        | 0.202        | 0.565        | 0.742        | 0.886       | <b>0.024</b> |
| Nursing-home | <b>0.001</b> | X            | 0.215        | 0.419        | 0.448        | 0.605        | 0.927       | 0.090        |
| Community    | <b>0.001</b> | <b>0.001</b> | X            | <b>0.007</b> | 0.771        | 0.525        | 0.275       | <b>0.004</b> |
| Influent     | <b>0.001</b> | <b>0.001</b> | <b>0.001</b> | X            | 0.121        | 0.141        | 0.397       | 0.162        |
| Effluent     | <b>0.001</b> | <b>0.001</b> | <b>0.001</b> | <b>0.001</b> | X            | 0.896        | 0.613       | <b>0.023</b> |
| Up-stream    | <b>0.001</b> | <b>0.001</b> | <b>0.001</b> | <b>0.001</b> | <b>0.001</b> | X            | 0.717       | 0.077        |
| Down-stream  | <b>0.001</b> | <b>0.001</b> | <b>0.001</b> | <b>0.001</b> | <b>0.001</b> | 0.967        | X           | 0.132        |
| Control      | <b>0.001</b> | <b>0.001</b> | <b>0.001</b> | <b>0.001</b> | <b>0.001</b> | <b>0.042</b> | 0.085       | X            |

**Table S2b. Statistical analysis of unweighted UniFrac distances along all the locations.** The p-values of the PERMANOVA test are shown below the diagonal (Adjustment method for p-value: FDR), and the permuted p-values using permutation test for homogeneity of multivariate dispersion are shown above the diagonal.

[illegible]

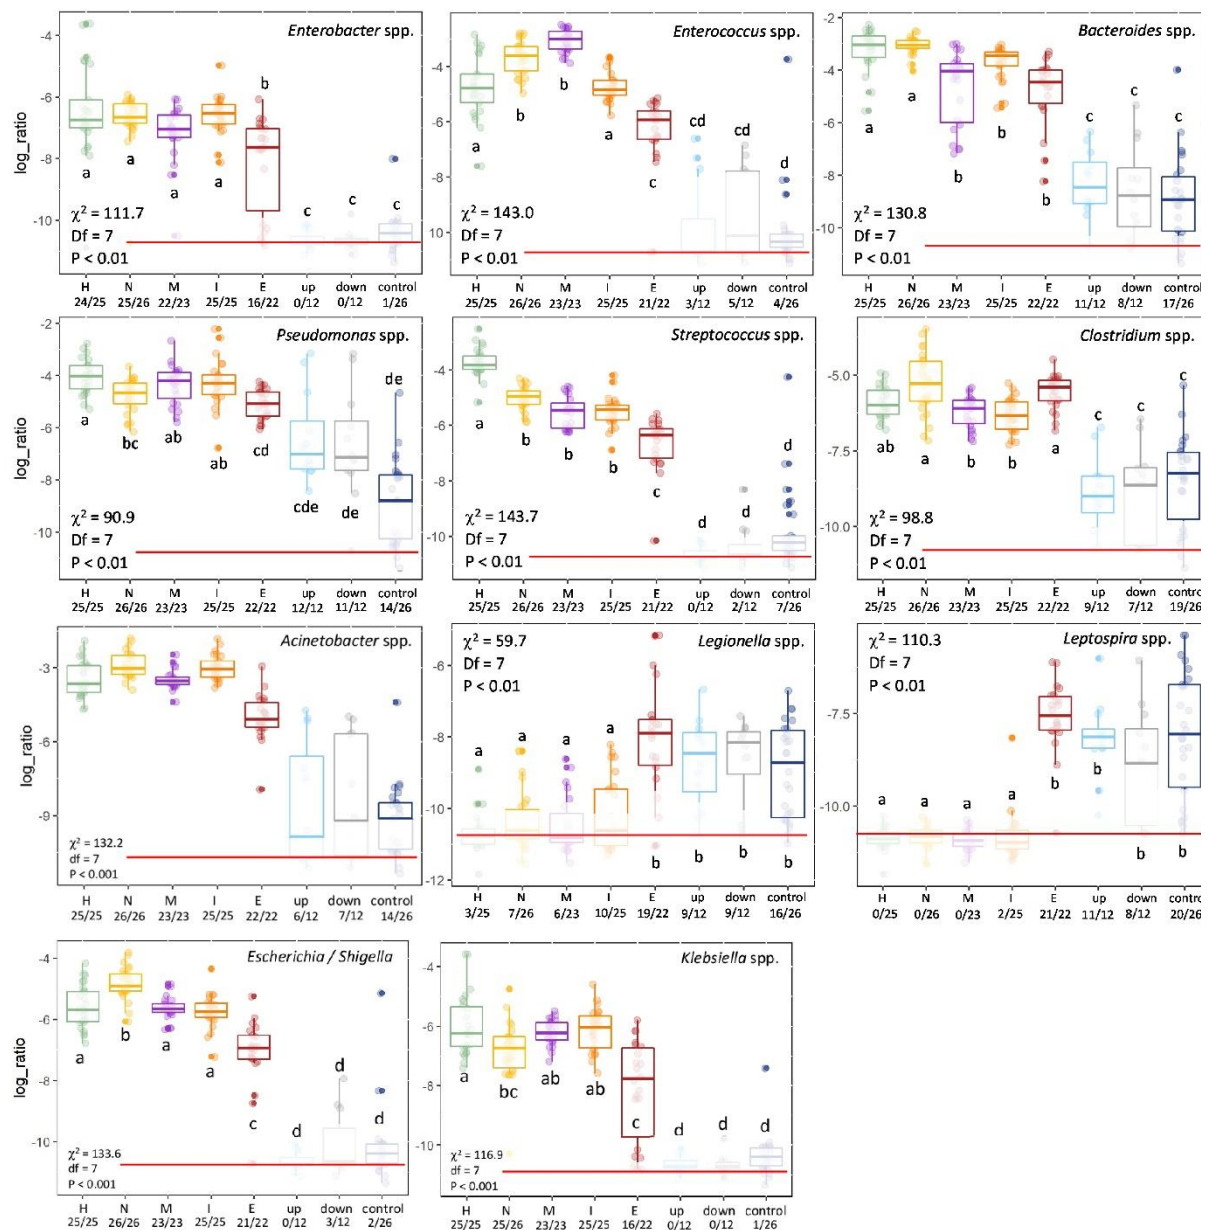

**Figure S3. Target genera based on pathogenic potential.** Relative abundance of target genera along the wastewater pathway. The Kruskal-Wallis statistics are shown on the left side of each panel, for all species there was significant difference in abundance observed between two or more locations. Group differences were assessed Dunn's test with P value adjustment method: BH. The red line represents the average detection limit. Samples below the detection limit are faded. H = hospital, N = nursing home, M = municipal, I = influent, E = effluent, up = upstream surface water, down = downstream surface water, and control = control surface water.

**Table S3. Clinical enriched bacteria.** 207 taxa were identified to be significantly more abundant in both hospital (H) and nursing-home (N) wastewater when compared to community (C) wastewater. Taxa belonging to the target genera that include potential pathogenic genera are shown in red.

| Bacterial identification |                     |                           |                    |                 | Mean abundance (%) |       |       | Log2-FoldChange |       | p-value |       |
|--------------------------|---------------------|---------------------------|--------------------|-----------------|--------------------|-------|-------|-----------------|-------|---------|-------|
| Class                    | Order               | Family                    | Genus              | Species         | H                  | N     | C     | H - C           | N - C | H - C   | N - C |
| Actinobacteria           | Actinomycetales     | Actinomycetaceae          | Actinomyces        | NA              | 0,041              | 0,069 | 0,001 | 3,402           | 3,983 | 0,000   | 0,000 |
| Actinobacteria           | Micrococcales       | Bogoriellaceae            | Georgenia          | NA              | 0,012              | 0,016 | 0,001 | 3,071           | 3,595 | 0,000   | 0,000 |
| Actinobacteria           | Micrococcales       | Micrococcaceae            | Glutamicibacter    | NA              | 0,018              | 0,013 | 0,003 | 2,637           | 2,239 | 0,020   | 0,058 |
| Actinobacteria           | NA                  | NA                        | NA                 | NA              | 0,005              | 0,028 | 0,000 | 2,190           | 4,115 | 0,020   | 0,000 |
| Actinobacteria           | Propionibacteriales | Propionibacteriaceae      | Propioniciclava    | NA              | 0,023              | 0,010 | 0,000 | 3,581           | 2,551 | 0,005   | 0,063 |
| Coriobacteriia           | Coriobacteriales    | Coriobacteriaceae         | Enterorhabdus      | NA              | 0,027              | 0,027 | 0,028 | 0,635           | 0,702 | 0,075   | 0,043 |
| Coriobacteriia           | Coriobacteriales    | Coriobacteriaceae         | Gordonibacter      | NA              | 0,020              | 0,032 | 0,003 | 2,737           | 3,133 | 0,000   | 0,000 |
| Coriobacteriia           | Coriobacteriales    | Coriobacteriaceae         | NA                 | NA              | 0,004              | 0,009 | 0,001 | 2,066           | 2,858 | 0,037   | 0,001 |
| Bacteroidia              | Bacteroidales       | Bacteroidaceae            | Bacteroides        | clarus          | 0,017              | 0,044 | 0,000 | 3,086           | 4,277 | 0,000   | 0,000 |
| Bacteroidia              | Bacteroidales       | Bacteroidaceae            | Bacteroides        | coprocola       | 0,067              | 0,072 | 0,013 | 1,890           | 1,761 | 0,000   | 0,001 |
| Bacteroidia              | Bacteroidales       | Bacteroidaceae            | Bacteroides        | eggerthii       | 0,062              | 0,064 | 0,007 | 2,193           | 2,443 | 0,000   | 0,000 |
| Bacteroidia              | Bacteroidales       | Bacteroidaceae            | Bacteroides        | NA              | 0,046              | 0,092 | 0,001 | 3,964           | 4,522 | 0,000   | 0,000 |
| Bacteroidia              | Bacteroidales       | Bacteroidaceae            | Bacteroides        | NA              | 0,232              | 0,187 | 0,015 | 3,292           | 3,031 | 0,000   | 0,000 |
| Bacteroidia              | Bacteroidales       | Bacteroidaceae            | Bacteroides        | NA              | 0,044              | 0,273 | 0,003 | 3,050           | 3,883 | 0,000   | 0,000 |
| Bacteroidia              | Bacteroidales       | Bacteroidaceae            | Bacteroides        | NA              | 0,068              | 0,060 | 0,012 | 2,140           | 2,063 | 0,001   | 0,002 |
| Bacteroidia              | Bacteroidales       | Bacteroidaceae            | Bacteroides        | NA              | 0,074              | 0,072 | 0,017 | 1,639           | 1,819 | 0,000   | 0,000 |
| Bacteroidia              | Bacteroidales       | Bacteroidaceae            | Bacteroides        | NA              | 0,117              | 0,122 | 0,031 | 1,225           | 1,313 | 0,000   | 0,000 |
| Bacteroidia              | Bacteroidales       | Bacteroidaceae            | Bacteroides        | NA              | 0,350              | 0,371 | 0,096 | 0,943           | 1,080 | 0,000   | 0,000 |
| Bacteroidia              | Bacteroidales       | Bacteroidaceae            | Bacteroides        | stercoris       | 0,114              | 0,067 | 0,002 | 4,068           | 4,095 | 0,000   | 0,000 |
| Bacteroidia              | Bacteroidales       | Bacteroidaceae            | Bacteroides        | thetaitaomicron | 0,091              | 0,077 | 0,008 | 2,399           | 2,469 | 0,000   | 0,000 |
| Bacteroidia              | Bacteroidales       | Bacteroidaceae            | Bacteroides        | uniformis       | 0,174              | 0,316 | 0,063 | 1,158           | 1,382 | 0,000   | 0,000 |
| Bacteroidia              | Bacteroidales       | Bacteroidaceae            | Bacteroides        | uniformis       | 0,271              | 0,408 | 0,053 | 1,143           | 1,384 | 0,000   | 0,000 |
| Bacteroidia              | Bacteroidales       | Bacteroidaceae            | Bacteroides        | vulgatus        | 0,245              | 0,377 | 0,079 | 1,104           | 1,352 | 0,000   | 0,000 |
| Bacteroidia              | Bacteroidales       | Bacteroidaceae            | Bacteroides        | vulgatus        | 0,378              | 0,461 | 0,132 | 0,731           | 0,800 | 0,000   | 0,000 |
| Bacteroidia              | Bacteroidales       | Bacteroidales_S24-7_group | NA                 | NA              | 0,035              | 0,028 | 0,001 | 3,494           | 3,318 | 0,000   | 0,000 |
| Bacteroidia              | Bacteroidales       | Bacteroidales_S24-7_group | NA                 | NA              | 0,008              | 0,073 | 0,001 | 2,387           | 4,226 | 0,000   | 0,000 |
| Bacteroidia              | Bacteroidales       | M2PB4-65_termite_group    | NA                 | NA              | 0,019              | 0,025 | 0,000 | 3,015           | 4,025 | 0,001   | 0,000 |
| Bacteroidia              | Bacteroidales       | Porphyromonadaceae        | Barnesiella        | NA              | 0,030              | 0,058 | 0,007 | 1,777           | 2,452 | 0,058   | 0,005 |
| Bacteroidia              | Bacteroidales       | Porphyromonadaceae        | Coprobacter        | NA              | 0,016              | 0,023 | 0,001 | 3,125           | 3,738 | 0,000   | 0,000 |
| Bacteroidia              | Bacteroidales       | Porphyromonadaceae        | Dysgonomonas       | oryzarvi        | 0,060              | 0,044 | 0,012 | 2,477           | 2,155 | 0,000   | 0,000 |
| Bacteroidia              | Bacteroidales       | Porphyromonadaceae        | Macellibacteroides | fermentans      | 0,270              | 0,309 | 0,218 | 0,386           | 0,386 | 0,070   | 0,070 |
| Bacteroidia              | Bacteroidales       | Porphyromonadaceae        | Macellibacteroides | NA              | 0,012              | 0,074 | 0,002 | 2,250           | 4,121 | 0,004   | 0,000 |

|             |               |                    |                                   |              |       |       |       |       |       |       |       |
|-------------|---------------|--------------------|-----------------------------------|--------------|-------|-------|-------|-------|-------|-------|-------|
| Bacteroidia | Bacteroidales | Porphyromonadaceae | Microbacter                       | NA           | 0,031 | 0,058 | 0,001 | 3,654 | 4,233 | 0,000 | 0,000 |
| Bacteroidia | Bacteroidales | Porphyromonadaceae | Microbacter                       | NA           | 0,009 | 0,044 | 0,000 | 3,259 | 4,248 | 0,000 | 0,000 |
| Bacteroidia | Bacteroidales | Porphyromonadaceae | NA                                | NA           | 0,011 | 0,015 | 0,000 | 3,126 | 3,494 | 0,000 | 0,000 |
| Bacteroidia | Bacteroidales | Porphyromonadaceae | NA                                | NA           | 0,058 | 0,052 | 0,018 | 1,086 | 1,254 | 0,014 | 0,003 |
| Bacteroidia | Bacteroidales | Porphyromonadaceae | Odoribacter                       | splanchnicus | 0,032 | 0,056 | 0,006 | 2,014 | 2,556 | 0,000 | 0,000 |
| Bacteroidia | Bacteroidales | Porphyromonadaceae | Odoribacter                       | splanchnicus | 0,044 | 0,058 | 0,007 | 1,796 | 2,299 | 0,001 | 0,000 |
| Bacteroidia | Bacteroidales | Porphyromonadaceae | Paludibacter                      | NA           | 0,023 | 0,020 | 0,000 | 3,526 | 3,760 | 0,000 | 0,000 |
| Bacteroidia | Bacteroidales | Porphyromonadaceae | Paludibacter                      | NA           | 0,104 | 0,193 | 0,008 | 2,689 | 3,051 | 0,000 | 0,000 |
| Bacteroidia | Bacteroidales | Porphyromonadaceae | Paludibacter                      | NA           | 0,010 | 0,158 | 0,002 | 1,696 | 4,253 | 0,054 | 0,000 |
| Bacteroidia | Bacteroidales | Porphyromonadaceae | Paludibacter                      | NA           | 0,166 | 0,067 | 0,034 | 1,276 | 0,809 | 0,000 | 0,025 |
| Bacteroidia | Bacteroidales | Porphyromonadaceae | Paludibacter                      | NA           | 0,164 | 0,345 | 0,024 | 1,223 | 1,737 | 0,000 | 0,000 |
| Bacteroidia | Bacteroidales | Porphyromonadaceae | Parabacteroides                   | distasonis   | 0,081 | 0,109 | 0,022 | 1,943 | 2,098 | 0,000 | 0,000 |
| Bacteroidia | Bacteroidales | Porphyromonadaceae | Parabacteroides                   | distasonis   | 0,021 | 0,034 | 0,007 | 1,801 | 2,061 | 0,002 | 0,000 |
| Bacteroidia | Bacteroidales | Porphyromonadaceae | Parabacteroides                   | goldsteinii  | 0,011 | 0,060 | 0,000 | 2,797 | 4,477 | 0,000 | 0,000 |
| Bacteroidia | Bacteroidales | Porphyromonadaceae | Parabacteroides                   | merdae       | 0,161 | 0,224 | 0,114 | 0,427 | 0,560 | 0,064 | 0,009 |
| Bacteroidia | Bacteroidales | Porphyromonadaceae | Parabacteroides                   | NA           | 0,080 | 0,011 | 0,002 | 3,942 | 2,156 | 0,000 | 0,004 |
| Bacteroidia | Bacteroidales | Porphyromonadaceae | Proteiniphilum                    | NA           | 0,003 | 0,016 | 0,000 | 1,889 | 3,716 | 0,059 | 0,000 |
| Bacteroidia | Bacteroidales | Prevotellaceae     | Paraprevotella                    | NA           | 0,024 | 0,050 | 0,001 | 3,231 | 4,130 | 0,000 | 0,000 |
| Bacteroidia | Bacteroidales | Prevotellaceae     | Paraprevotella                    | NA           | 0,033 | 0,019 | 0,004 | 2,813 | 2,465 | 0,000 | 0,000 |
| Bacteroidia | Bacteroidales | Prevotellaceae     | Prevotella_9                      | NA           | 1,061 | 0,938 | 0,011 | 4,128 | 4,223 | 0,000 | 0,000 |
| Bacteroidia | Bacteroidales | Prevotellaceae     | Prevotella_9                      | NA           | 0,023 | 0,029 | 0,000 | 2,969 | 3,577 | 0,028 | 0,005 |
| Bacteroidia | Bacteroidales | Prevotellaceae     | Prevotella_9                      | NA           | 0,076 | 0,104 | 0,018 | 1,848 | 2,003 | 0,013 | 0,006 |
| Bacteroidia | Bacteroidales | Prevotellaceae     | Prevotella_9                      | NA           | 0,008 | 0,130 | 0,002 | 1,755 | 4,406 | 0,026 | 0,000 |
| Bacteroidia | Bacteroidales | Prevotellaceae     | Prevotellaceae_NK3B31_group       | NA           | 0,029 | 0,019 | 0,001 | 3,479 | 2,740 | 0,001 | 0,015 |
| Bacteroidia | Bacteroidales | Prolixibacteraceae | Prolixibacter                     | NA           | 0,021 | 0,014 | 0,000 | 3,611 | 3,291 | 0,000 | 0,000 |
| Bacteroidia | Bacteroidales | Prolixibacteraceae | Prolixibacter                     | NA           | 0,010 | 0,009 | 0,000 | 2,554 | 2,410 | 0,045 | 0,062 |
| Bacteroidia | Bacteroidales | Rikenellaceae      | Alistipes                         | finegoldii   | 0,031 | 0,048 | 0,000 | 3,971 | 4,480 | 0,000 | 0,000 |
| Bacteroidia | Bacteroidales | Rikenellaceae      | Alistipes                         | inops        | 0,030 | 0,034 | 0,007 | 1,815 | 2,075 | 0,000 | 0,000 |
| Bacteroidia | Bacteroidales | Rikenellaceae      | Alistipes                         | NA           | 0,046 | 0,018 | 0,002 | 3,258 | 2,322 | 0,000 | 0,003 |
| Bacteroidia | Bacteroidales | Rikenellaceae      | Alistipes                         | NA           | 0,005 | 0,005 | 0,000 | 2,445 | 2,546 | 0,096 | 0,082 |
| Bacteroidia | Bacteroidales | Rikenellaceae      | Alistipes                         | NA           | 0,015 | 0,014 | 0,003 | 2,414 | 2,317 | 0,024 | 0,032 |
| Bacteroidia | Bacteroidales | Rikenellaceae      | Alistipes                         | NA           | 0,129 | 0,169 | 0,015 | 1,861 | 2,109 | 0,000 | 0,000 |
| Bacteroidia | Bacteroidales | Rikenellaceae      | Alistipes                         | NA           | 0,014 | 0,011 | 0,004 | 1,791 | 1,893 | 0,023 | 0,014 |
| Bacteroidia | Bacteroidales | Rikenellaceae      | Alistipes                         | obesi        | 0,024 | 0,024 | 0,004 | 2,062 | 2,372 | 0,000 | 0,000 |
| Bacteroidia | Bacteroidales | Rikenellaceae      | Alistipes                         | putredinis   | 0,258 | 0,251 | 0,040 | 1,071 | 1,131 | 0,000 | 0,000 |
| Bacteroidia | Bacteroidales | Rikenellaceae      | Alistipes                         | shahii       | 0,035 | 0,043 | 0,000 | 3,757 | 4,095 | 0,000 | 0,000 |
| Bacteroidia | Bacteroidales | Rikenellaceae      | Anaerocella                       | delicata     | 0,101 | 0,057 | 0,001 | 4,270 | 4,090 | 0,000 | 0,000 |
| Bacteroidia | Bacteroidales | Rikenellaceae      | dgA-11_gut_group                  | NA           | 0,392 | 0,017 | 0,008 | 2,790 | 1,366 | 0,000 | 0,001 |
| Bacteroidia | Bacteroidales | Rikenellaceae      | vadinBC27_wastewater-sludge_group | NA           | 0,057 | 0,039 | 0,007 | 2,162 | 2,013 | 0,000 | 0,000 |
| Bacteroidia | Bacteroidales | Rikenellaceae      | vadinBC27_wastewater-sludge_group | NA           | 0,016 | 0,024 | 0,007 | 1,281 | 1,772 | 0,022 | 0,001 |
| Bacteroidia | Bacteroidales | Rikenellaceae      | vadinBC27_wastewater-sludge_group | NA           | 0,099 | 0,039 | 0,025 | 0,835 | 0,608 | 0,004 | 0,055 |

|                  |                     |                     |                               |               |       |       |       |       |       |       |       |
|------------------|---------------------|---------------------|-------------------------------|---------------|-------|-------|-------|-------|-------|-------|-------|
| Flavobacteriia   | Flavobacteriales    | Flavobacteriaceae   | Cloacibacterium               | normanense    | 1,412 | 0,542 | 0,339 | 0,625 | 0,337 | 0,000 | 0,098 |
| Flavobacteriia   | Flavobacteriales    | Flavobacteriaceae   | Flavobacterium                | NA            | 0,015 | 0,041 | 0,002 | 2,755 | 3,668 | 0,000 | 0,000 |
| Flavobacteriia   | Flavobacteriales    | Flavobacteriaceae   | Flavobacterium                | NA            | 0,141 | 0,092 | 0,020 | 1,817 | 1,688 | 0,000 | 0,000 |
| Sphingobacteriia | Sphingobacteriales  | KD1-131             | NA                            | NA            | 0,004 | 0,018 | 0,000 | 1,888 | 3,825 | 0,045 | 0,000 |
| Sphingobacteriia | Sphingobacteriales  | ST-12K33            | NA                            | NA            | 0,041 | 0,017 | 0,004 | 2,753 | 2,102 | 0,005 | 0,045 |
| Sphingobacteriia | Sphingobacteriales  | ST-12K33            | NA                            | NA            | 0,096 | 0,033 | 0,036 | 1,479 | 0,722 | 0,000 | 0,068 |
| Chlorobia        | Chlorobiales        | OPB56               | NA                            | NA            | 0,022 | 0,015 | 0,001 | 2,792 | 3,194 | 0,001 | 0,000 |
| Melainabacteria  | Gastranaerophilales | NA                  | NA                            | NA            | 0,008 | 0,022 | 0,002 | 1,580 | 2,779 | 0,073 | 0,000 |
| Fibrobacteria    | Fibrobacterales     | Fibrobacteraceae    | possible_genus_06             | NA            | 0,055 | 0,030 | 0,001 | 4,098 | 3,612 | 0,000 | 0,000 |
| Fibrobacteria    | Fibrobacterales     | Fibrobacteraceae    | possible_genus_06             | NA            | 0,044 | 0,006 | 0,002 | 3,651 | 2,020 | 0,000 | 0,030 |
| Bacilli          | Lactobacillales     | Lactobacillaceae    | Lactobacillus                 | delbrueckii   | 0,889 | 0,041 | 0,002 | 4,867 | 2,540 | 0,000 | 0,000 |
| Bacilli          | Lactobacillales     | Lactobacillaceae    | Lactobacillus                 | delbrueckii   | 1,278 | 0,301 | 0,013 | 4,189 | 3,898 | 0,000 | 0,000 |
| Bacilli          | Lactobacillales     | Lactobacillaceae    | Lactobacillus                 | NA            | 0,096 | 0,040 | 0,001 | 3,822 | 4,070 | 0,000 | 0,000 |
| Bacilli          | Lactobacillales     | Lactobacillaceae    | Lactobacillus                 | NA            | 0,005 | 0,029 | 0,001 | 1,565 | 3,652 | 0,051 | 0,000 |
| Bacilli          | Lactobacillales     | Streptococcaceae    | Lactococcus                   | NA            | 0,492 | 3,768 | 0,074 | 0,921 | 1,442 | 0,000 | 0,000 |
| Bacilli          | Lactobacillales     | Streptococcaceae    | Lactococcus                   | NA            | 0,269 | 0,970 | 0,039 | 0,920 | 1,443 | 0,000 | 0,000 |
| Bacilli          | Lactobacillales     | Streptococcaceae    | Lactococcus                   | raffinolactis | 0,321 | 1,994 | 0,079 | 1,448 | 2,043 | 0,000 | 0,000 |
| Bacilli          | Lactobacillales     | Streptococcaceae    | Streptococcus                 | NA            | 1,384 | 0,219 | 0,067 | 1,147 | 0,448 | 0,000 | 0,062 |
| Clostridia       | Clostridiales       | Christensenellaceae | Christensenellaceae_R-7_group | NA            | 0,068 | 0,010 | 0,000 | 4,445 | 2,646 | 0,000 | 0,009 |
| Clostridia       | Clostridiales       | Christensenellaceae | Christensenellaceae_R-7_group | NA            | 0,010 | 0,019 | 0,002 | 2,693 | 3,253 | 0,000 | 0,000 |
| Clostridia       | Clostridiales       | Christensenellaceae | Christensenellaceae_R-7_group | NA            | 0,041 | 0,079 | 0,005 | 2,327 | 2,810 | 0,000 | 0,000 |
| Clostridia       | Clostridiales       | Christensenellaceae | Christensenellaceae_R-7_group | NA            | 0,089 | 0,047 | 0,021 | 1,293 | 1,112 | 0,000 | 0,000 |
| Clostridia       | Clostridiales       | Christensenellaceae | Christensenellaceae_R-7_group | NA            | 0,021 | 0,047 | 0,015 | 0,612 | 1,220 | 0,084 | 0,000 |
| Clostridia       | Clostridiales       | Clostridiaceae_1    | Proteiniclasticum             | ruminis       | 0,083 | 0,096 | 0,005 | 3,239 | 3,354 | 0,000 | 0,000 |
| Clostridia       | Clostridiales       | Eubacteriaceae      | Anaerofustis                  | NA            | 0,010 | 0,007 | 0,002 | 2,379 | 1,944 | 0,002 | 0,017 |
| Clostridia       | Clostridiales       | Eubacteriaceae      | NA                            | NA            | 3,518 | 0,147 | 0,049 | 1,778 | 0,840 | 0,000 | 0,000 |
| Clostridia       | Clostridiales       | Family_XI           | NA                            | NA            | 0,020 | 0,040 | 0,010 | 1,159 | 1,914 | 0,010 | 0,000 |
| Clostridia       | Clostridiales       | Family_XI           | Tissierella                   | NA            | 0,025 | 0,009 | 0,000 | 3,992 | 3,131 | 0,000 | 0,000 |
| Clostridia       | Clostridiales       | Family_XI           | Tissierella                   | NA            | 0,013 | 0,045 | 0,001 | 2,442 | 3,754 | 0,000 | 0,000 |
| Clostridia       | Clostridiales       | Lachnospiraceae     | Butyrivibrio                  | crossotus     | 0,027 | 0,050 | 0,005 | 2,227 | 2,673 | 0,000 | 0,000 |
| Clostridia       | Clostridiales       | Lachnospiraceae     | Coprococcus_2                 | eutactus      | 0,057 | 0,103 | 0,005 | 2,402 | 3,113 | 0,000 | 0,000 |
| Clostridia       | Clostridiales       | Lachnospiraceae     | Coprococcus_2                 | NA            | 0,041 | 0,010 | 0,001 | 3,899 | 2,524 | 0,000 | 0,000 |
| Clostridia       | Clostridiales       | Lachnospiraceae     | Fusicatenibacter              | NA            | 0,034 | 0,046 | 0,013 | 1,333 | 1,603 | 0,000 | 0,000 |
| Clostridia       | Clostridiales       | Lachnospiraceae     | Howardella                    | NA            | 0,003 | 0,010 | 0,002 | 1,545 | 2,994 | 0,080 | 0,000 |
| Clostridia       | Clostridiales       | Lachnospiraceae     | NA                            | NA            | 0,098 | 0,049 | 0,000 | 4,898 | 4,200 | 0,000 | 0,000 |
| Clostridia       | Clostridiales       | Lachnospiraceae     | NA                            | NA            | 0,029 | 0,046 | 0,003 | 2,641 | 2,965 | 0,000 | 0,000 |
| Clostridia       | Clostridiales       | Lachnospiraceae     | NA                            | NA            | 0,008 | 0,007 | 0,002 | 2,295 | 2,076 | 0,016 | 0,032 |
| Clostridia       | Clostridiales       | Lachnospiraceae     | NA                            | NA            | 0,047 | 0,101 | 0,015 | 1,246 | 1,736 | 0,000 | 0,000 |
| Clostridia       | Clostridiales       | Lachnospiraceae     | NA                            | NA            | 0,018 | 0,027 | 0,009 | 1,039 | 1,475 | 0,093 | 0,009 |
| Clostridia       | Clostridiales       | Lachnospiraceae     | NA                            | NA            | 0,196 | 0,132 | 0,055 | 0,911 | 0,729 | 0,000 | 0,006 |
| Clostridia       | Clostridiales       | Lachnospiraceae     | Roseburia                     | intestinalis  | 0,031 | 0,024 | 0,004 | 2,928 | 2,630 | 0,016 | 0,033 |
| Clostridia       | Clostridiales       | Lachnospiraceae     | Roseburia                     | NA            | 0,020 | 0,106 | 0,011 | 0,909 | 2,152 | 0,079 | 0,000 |
| Clostridia       | Clostridiales       | Ruminococcaceae     | Ercella                       | NA            | 0,023 | 0,030 | 0,004 | 2,589 | 2,803 | 0,000 | 0,000 |

|                                                  |                    |                     |                               |              |       |       |       |       |       |       |       |
|--------------------------------------------------|--------------------|---------------------|-------------------------------|--------------|-------|-------|-------|-------|-------|-------|-------|
| Clostridia                                       | Clostridiales      | Ruminococcaceae     | Intestinimonas                | NA           | 0,009 | 0,012 | 0,000 | 2,927 | 3,134 | 0,022 | 0,012 |
| Clostridia                                       | Clostridiales      | Ruminococcaceae     | Intestinimonas                | NA           | 0,011 | 0,019 | 0,000 | 2,713 | 3,848 | 0,006 | 0,000 |
| Clostridia                                       | Clostridiales      | Ruminococcaceae     | Intestinimonas                | NA           | 0,007 | 0,018 | 0,001 | 2,059 | 3,405 | 0,023 | 0,000 |
| Clostridia                                       | Clostridiales      | Ruminococcaceae     | NA                            | NA           | 0,015 | 0,057 | 0,000 | 3,659 | 4,585 | 0,000 | 0,000 |
| Clostridia                                       | Clostridiales      | Ruminococcaceae     | NA                            | NA           | 0,010 | 0,020 | 0,000 | 2,720 | 3,783 | 0,001 | 0,000 |
| Clostridia                                       | Clostridiales      | Ruminococcaceae     | NA                            | NA           | 0,005 | 0,012 | 0,000 | 2,259 | 3,324 | 0,070 | 0,003 |
| Clostridia                                       | Clostridiales      | Ruminococcaceae     | NA                            | NA           | 0,023 | 0,035 | 0,010 | 1,111 | 1,662 | 0,009 | 0,000 |
| Clostridia                                       | Clostridiales      | Ruminococcaceae     | NA                            | NA           | 0,024 | 0,020 | 0,010 | 0,987 | 0,965 | 0,057 | 0,064 |
| Clostridia                                       | Clostridiales      | Ruminococcaceae     | NA                            | NA           | 0,067 | 0,112 | 0,039 | 0,578 | 0,793 | 0,025 | 0,001 |
| Clostridia                                       | Clostridiales      | Ruminococcaceae     | Ruminiclostridium_5           | NA           | 0,016 | 0,048 | 0,004 | 1,937 | 2,978 | 0,000 | 0,000 |
| Clostridia                                       | Clostridiales      | Ruminococcaceae     | Ruminiclostridium_6           | NA           | 0,043 | 0,102 | 0,001 | 4,025 | 4,572 | 0,000 | 0,000 |
| Clostridia                                       | Clostridiales      | Ruminococcaceae     | Ruminococcaceae_NK4A214_group | NA           | 0,020 | 0,014 | 0,004 | 2,291 | 1,850 | 0,001 | 0,011 |
| Clostridia                                       | Clostridiales      | Ruminococcaceae     | Ruminococcaceae_UCG-002       | NA           | 0,006 | 0,033 | 0,000 | 1,969 | 4,062 | 0,093 | 0,000 |
| Clostridia                                       | Clostridiales      | Ruminococcaceae     | Ruminococcaceae_UCG-002       | NA           | 0,097 | 0,112 | 0,047 | 0,584 | 0,731 | 0,021 | 0,002 |
| Clostridia                                       | Clostridiales      | Ruminococcaceae     | Ruminococcaceae_UCG-002       | NA           | 0,117 | 0,160 | 0,103 | 0,405 | 0,543 | 0,096 | 0,016 |
| Clostridia                                       | Clostridiales      | Ruminococcaceae     | Ruminococcaceae_UCG-004       | NA           | 0,008 | 0,020 | 0,004 | 1,294 | 2,608 | 0,060 | 0,000 |
| Clostridia                                       | Clostridiales      | Ruminococcaceae     | Ruminococcaceae_UCG-005       | NA           | 0,013 | 0,018 | 0,000 | 2,764 | 3,447 | 0,010 | 0,001 |
| Clostridia                                       | Clostridiales      | Ruminococcaceae     | Ruminococcaceae_UCG-010       | NA           | 0,005 | 0,006 | 0,002 | 2,084 | 2,360 | 0,015 | 0,004 |
| Clostridia                                       | Clostridiales      | Ruminococcaceae     | Ruminococcaceae_UCG-014       | NA           | 0,035 | 0,117 | 0,008 | 2,031 | 2,554 | 0,000 | 0,000 |
| Clostridia                                       | Clostridiales      | Ruminococcaceae     | Ruminococcaceae_UCG-014       | NA           | 0,046 | 0,047 | 0,026 | 0,689 | 0,562 | 0,019 | 0,069 |
| Clostridia                                       | Clostridiales      | Ruminococcaceae     | Ruminococcus_1                | bicirculans  | 0,086 | 0,073 | 0,002 | 3,944 | 3,830 | 0,000 | 0,000 |
| Clostridia                                       | Clostridiales      | Ruminococcaceae     | Ruminococcus_1                | NA           | 0,009 | 0,012 | 0,000 | 2,970 | 3,202 | 0,010 | 0,004 |
| Clostridia                                       | Clostridiales      | Ruminococcaceae     | Ruminococcus_1                | NA           | 0,004 | 0,018 | 0,000 | 2,045 | 3,988 | 0,017 | 0,000 |
| Clostridia                                       | Clostridiales      | Ruminococcaceae     | Ruminococcus_2                | bromii       | 0,084 | 0,150 | 0,023 | 1,259 | 1,777 | 0,000 | 0,000 |
| Clostridia                                       | Clostridiales      | Ruminococcaceae     | Ruminococcus_2                | bromii       | 0,183 | 0,126 | 0,081 | 0,806 | 0,570 | 0,000 | 0,020 |
| Clostridia                                       | Clostridiales      | Ruminococcaceae     | Ruminococcus_2                | NA           | 0,110 | 0,071 | 0,031 | 1,124 | 1,038 | 0,001 | 0,002 |
| Erysipelotrichia                                 | Erysipelotrichales | Erysipelotrichaceae | Catenisphaera                 | NA           | 0,018 | 0,024 | 0,007 | 1,525 | 2,066 | 0,023 | 0,001 |
| Erysipelotrichia                                 | Erysipelotrichales | Erysipelotrichaceae | Erysipelothrix                | NA           | 0,045 | 0,018 | 0,004 | 3,035 | 1,753 | 0,000 | 0,032 |
| Erysipelotrichia                                 | Erysipelotrichales | Erysipelotrichaceae | Erysipelothrix                | NA           | 0,008 | 0,009 | 0,001 | 2,553 | 2,756 | 0,002 | 0,001 |
| Erysipelotrichia                                 | Erysipelotrichales | Erysipelotrichaceae | Faecalitalea                  | cylindroides | 0,005 | 0,015 | 0,003 | 1,676 | 2,694 | 0,045 | 0,000 |
| Erysipelotrichia                                 | Erysipelotrichales | Erysipelotrichaceae | Faecalitalea                  | NA           | 0,005 | 0,009 | 0,000 | 2,326 | 2,984 | 0,097 | 0,023 |
| Erysipelotrichia                                 | Erysipelotrichales | Erysipelotrichaceae | NA                            | NA           | 0,009 | 0,013 | 0,001 | 2,548 | 2,847 | 0,037 | 0,016 |
| Negativicutes                                    | Selenomonadales    | Acidaminococcaceae  | Phascolarctobacterium         | NA           | 0,028 | 0,019 | 0,007 | 2,123 | 1,620 | 0,001 | 0,014 |
| Negativicutes                                    | Selenomonadales    | Veillonellaceae     | Anaeroarcus                   | burkinensis  | 0,083 | 0,071 | 0,004 | 3,073 | 2,925 | 0,000 | 0,000 |
| Negativicutes                                    | Selenomonadales    | Veillonellaceae     | Anaeroarcus                   | NA           | 0,237 | 0,204 | 0,036 | 1,090 | 0,995 | 0,000 | 0,000 |
| Negativicutes                                    | Selenomonadales    | Veillonellaceae     | Megasphaera                   | NA           | 0,126 | 0,040 | 0,001 | 4,217 | 3,448 | 0,000 | 0,000 |
| Negativicutes                                    | Selenomonadales    | Veillonellaceae     | NA                            | NA           | 0,043 | 0,046 | 0,023 | 0,868 | 1,039 | 0,005 | 0,000 |
| Negativicutes                                    | Selenomonadales    | Veillonellaceae     | Selenomonas                   | lacticifex   | 0,070 | 0,120 | 0,006 | 2,733 | 2,996 | 0,000 | 0,000 |
| Negativicutes                                    | Selenomonadales    | Veillonellaceae     | Veillonella                   | NA           | 0,250 | 0,287 | 0,001 | 4,295 | 4,773 | 0,000 | 0,000 |
| Fusobacteriia                                    | Fusobacteriales    | Leptotrichiaceae    | NA                            | NA           | 0,303 | 0,047 | 0,004 | 4,138 | 3,259 | 0,000 | 0,000 |
| Bacteria belonging tot he phylum Gracilibacteria |                    |                     |                               |              | 0,078 | 0,037 | 0,008 | 2,052 | 1,806 | 0,000 | 0,000 |
| Lentisphaeria                                    | Victivallales      | Victivallaceae      | Victivallis                   | NA           | 0,010 | 0,012 | 0,004 | 1,337 | 1,797 | 0,095 | 0,015 |
| Alphaproteobacteria                              | Rhodospirillales   | Rhodospirillaceae   | Elstera                       | NA           | 0,018 | 0,007 | 0,002 | 3,026 | 2,273 | 0,000 | 0,009 |



|                                                   |                    |                     |                  |                   |        |        |       |       |       |       |       |
|---------------------------------------------------|--------------------|---------------------|------------------|-------------------|--------|--------|-------|-------|-------|-------|-------|
| Alphaproteobacteria                               | Rhodospirillales   | Rhodospirillaceae   | NA               | NA                | 0,014  | 0,014  | 0,004 | 1,621 | 1,237 | 0,017 | 0,088 |
| Alphaproteobacteria                               | Rhodospirillales   | Rhodospirillaceae   | NA               | NA                | 0,045  | 0,045  | 0,020 | 1,023 | 1,129 | 0,003 | 0,001 |
| Betaproteobacteria                                | Burkholderiales    | Alcaligenaceae      | Sutterella       | NA                | 0,006  | 0,046  | 0,000 | 2,555 | 4,339 | 0,004 | 0,000 |
| Betaproteobacteria                                | Burkholderiales    | Comamonadaceae      | Acidovorax       | NA                | 0,032  | 0,044  | 0,007 | 2,462 | 2,693 | 0,001 | 0,000 |
| Betaproteobacteria                                | Burkholderiales    | Comamonadaceae      | Diaphorobacter   | NA                | 0,163  | 0,075  | 0,039 | 1,540 | 1,125 | 0,000 | 0,000 |
| Betaproteobacteria                                | DR-16              | NA                  | NA               | NA                | 0,684  | 0,093  | 0,000 | 5,237 | 4,495 | 0,000 | 0,000 |
| Betaproteobacteria                                | Neisseriales       | Neisseriaceae       | Formivibrio      | NA                | 0,026  | 0,149  | 0,003 | 2,521 | 3,433 | 0,000 | 0,000 |
| Betaproteobacteria                                | Neisseriales       | Neisseriaceae       | Laribacter       | hongkongensis     | 0,081  | 0,035  | 0,019 | 2,057 | 1,437 | 0,000 | 0,000 |
| Betaproteobacteria                                | Neisseriales       | Neisseriaceae       | Microvirgula     | aerodenitrificans | 0,012  | 0,040  | 0,001 | 3,069 | 3,871 | 0,000 | 0,000 |
| Betaproteobacteria                                | Rhodocyclales      | Rhodocyclaceae      | Dechlorobacter   | NA                | 0,262  | 0,212  | 0,106 | 1,164 | 0,986 | 0,000 | 0,000 |
| Betaproteobacteria                                | Rhodocyclales      | Rhodocyclaceae      | Dechloromonas    | NA                | 0,511  | 0,168  | 0,032 | 1,671 | 1,388 | 0,000 | 0,000 |
| Betaproteobacteria                                | Rhodocyclales      | Rhodocyclaceae      | Propionivibrio   | NA                | 0,061  | 0,017  | 0,000 | 4,357 | 3,322 | 0,000 | 0,000 |
| Betaproteobacteria                                | Rhodocyclales      | Rhodocyclaceae      | Propionivibrio   | NA                | 0,345  | 0,090  | 0,053 | 1,513 | 0,956 | 0,000 | 0,000 |
| Deltaproteobacteria                               | Desulfobacterales  | Desulfobulbaceae    | Desulfobulbus    | NA                | 0,032  | 0,006  | 0,000 | 3,995 | 2,380 | 0,000 | 0,033 |
| Deltaproteobacteria                               | Desulfovibrionales | Desulfovibrionaceae | Desulfovibrio    | desulfuricans     | 0,205  | 0,099  | 0,086 | 0,728 | 0,426 | 0,001 | 0,094 |
| Deltaproteobacteria                               | Desulfovibrionales | Desulfovibrionaceae | Desulfovibrio    | intestinalis      | 0,058  | 0,067  | 0,022 | 1,258 | 1,123 | 0,000 | 0,000 |
| Epsilonproteobacteria                             | Campylobacterales  | Campylobacteraceae  | Arcobacter       | aquimarinus       | 0,139  | 0,413  | 0,025 | 1,548 | 2,366 | 0,006 | 0,000 |
| Epsilonproteobacteria                             | Campylobacterales  | Campylobacteraceae  | Arcobacter       | butzleri          | 0,795  | 0,769  | 0,183 | 0,952 | 1,251 | 0,000 | 0,000 |
| Epsilonproteobacteria                             | Campylobacterales  | Campylobacteraceae  | Arcobacter       | cryaerophilus     | 11,237 | 10,135 | 4,013 | 0,363 | 0,355 | 0,017 | 0,019 |
| Epsilonproteobacteria                             | Campylobacterales  | Campylobacteraceae  | Arcobacter       | NA                | 0,564  | 0,382  | 0,118 | 1,964 | 1,931 | 0,000 | 0,000 |
| Epsilonproteobacteria                             | Campylobacterales  | Campylobacteraceae  | Arcobacter       | NA                | 0,115  | 0,285  | 0,036 | 1,803 | 2,728 | 0,021 | 0,000 |
| Epsilonproteobacteria                             | Campylobacterales  | Campylobacteraceae  | Arcobacter       | NA                | 0,035  | 0,129  | 0,008 | 1,514 | 2,945 | 0,068 | 0,000 |
| Epsilonproteobacteria                             | Campylobacterales  | Campylobacteraceae  | Sulfurospirillum | cavolei           | 0,005  | 0,090  | 0,000 | 2,384 | 4,425 | 0,017 | 0,000 |
| Epsilonproteobacteria                             | Campylobacterales  | Campylobacteraceae  | Sulfurospirillum | NA                | 0,009  | 0,119  | 0,003 | 1,590 | 3,704 | 0,010 | 0,000 |
| Gammaproteobacteria                               | Aeromonadales      | Aeromonadaceae      | Aeromonas        | NA                | 0,257  | 0,007  | 0,000 | 5,114 | 1,647 | 0,000 | 0,038 |
| Gammaproteobacteria                               | Aeromonadales      | Aeromonadaceae      | Tolomonas        | NA                | 0,183  | 0,494  | 0,038 | 1,744 | 2,394 | 0,000 | 0,000 |
| Gammaproteobacteria                               | Aeromonadales      | Aeromonadaceae      | Tolomonas        | NA                | 0,007  | 0,180  | 0,002 | 1,331 | 4,702 | 0,093 | 0,000 |
| Gammaproteobacteria                               | Enterobacteriales  | Enterobacteriaceae  | Citrobacter      | NA                | 0,024  | 0,031  | 0,004 | 2,510 | 3,010 | 0,015 | 0,002 |
| Gammaproteobacteria                               | Enterobacteriales  | Enterobacteriaceae  | Enterobacter     | NA                | 0,325  | 0,088  | 0,040 | 0,569 | 0,507 | 0,048 | 0,086 |
| Gammaproteobacteria                               | Enterobacteriales  | Enterobacteriaceae  | Klebsiella       | NA                | 0,159  | 0,021  | 0,010 | 2,686 | 1,283 | 0,000 | 0,018 |
| Gammaproteobacteria                               | Pseudomonadales    | Moraxellaceae       | Acinetobacter    | bouvetii          | 0,052  | 0,154  | 0,017 | 1,641 | 1,597 | 0,080 | 0,091 |
| Gammaproteobacteria                               | Pseudomonadales    | Moraxellaceae       | Acinetobacter    | haemolyticus      | 0,024  | 0,152  | 0,002 | 2,857 | 4,262 | 0,000 | 0,000 |
| Gammaproteobacteria                               | Pseudomonadales    | Moraxellaceae       | Acinetobacter    | johnsonii         | 0,166  | 0,184  | 0,004 | 4,104 | 3,683 | 0,000 | 0,000 |
| Gammaproteobacteria                               | Pseudomonadales    | Moraxellaceae       | Acinetobacter    | johnsonii         | 0,408  | 0,520  | 0,147 | 0,396 | 0,543 | 0,065 | 0,006 |
| Gammaproteobacteria                               | Pseudomonadales    | Moraxellaceae       | Acinetobacter    | NA                | 0,046  | 0,160  | 0,000 | 3,475 | 4,716 | 0,000 | 0,000 |
| Gammaproteobacteria                               | Pseudomonadales    | Moraxellaceae       | Acinetobacter    | NA                | 0,014  | 0,428  | 0,003 | 1,706 | 4,335 | 0,006 | 0,000 |
| Gammaproteobacteria                               | Pseudomonadales    | Moraxellaceae       | Acinetobacter    | NA                | 0,567  | 0,924  | 0,187 | 0,448 | 0,601 | 0,026 | 0,001 |
| Gammaproteobacteria                               | Pseudomonadales    | Pseudomonadaceae    | Pseudomonas      | NA                | 0,024  | 0,066  | 0,008 | 1,644 | 2,285 | 0,000 | 0,000 |
| Gammaproteobacteria                               | Pseudomonadales    | Pseudomonadaceae    | Pseudomonas      | NA                | 0,128  | 0,046  | 0,035 | 1,440 | 0,721 | 0,000 | 0,031 |
| Gammaproteobacteria                               | Pseudomonadales    | Pseudomonadaceae    | Pseudomonas      | pseudoalcaligenes | 1,274  | 0,159  | 0,110 | 1,143 | 0,619 | 0,000 | 0,005 |
| Gammaproteobacteria                               | Xanthomonadales    | Xanthomonadaceae    | Stenotrophomonas | maltpophilia      | 0,018  | 0,031  | 0,006 | 2,004 | 2,344 | 0,093 | 0,042 |
| Bacteria belonging to the phylum Saccharibacteria |                    |                     |                  |                   | 0,013  | 0,021  | 0,000 | 3,413 | 3,467 | 0,001 | 0,000 |
| Bacteria belonging to the phylum Saccharibacteria |                    |                     |                  |                   | 0,009  | 0,052  | 0,000 | 3,087 | 4,397 | 0,000 | 0,000 |

|                                                   |               |                |             |    |       |       |       |       |       |       |       |
|---------------------------------------------------|---------------|----------------|-------------|----|-------|-------|-------|-------|-------|-------|-------|
| Bacteria belonging to the phylum Saccharibacteria |               |                |             |    | 0,028 | 0,078 | 0,005 | 2,116 | 2,783 | 0,026 | 0,002 |
| Bacteria belonging to the phylum Saccharibacteria |               |                |             |    | 0,064 | 0,068 | 0,018 | 1,075 | 1,172 | 0,000 | 0,000 |
| Synergistia                                       | Synergistales | Synergistaceae | Lactivibrio | NA | 0,061 | 0,004 | 0,001 | 3,897 | 1,760 | 0,000 | 0,056 |
| Mollicutes                                        | NB1-n         | NA             | NA          | NA | 0,005 | 0,013 | 0,000 | 2,051 | 3,759 | 0,026 | 0,000 |
| Verrucomicrobia<br>OPB35_soil_group               | NA            | NA             | NA          | NA | 0,167 | 0,013 | 0,000 | 5,010 | 3,761 | 0,000 | 0,000 |

**Table S4. Clinical indicator bacteria in influent.** 10 of the 207 *clinical enriched taxa* were found to be significant more abundant in influent (I) when compared to community (C) wastewater. 4 of the *clinical indicator bacteria* were found to be more abundant in community wastewater when compared to influent (shown in grey), however, for three species the difference was not significant ( $p > 0.05$ ).

| Bacterial identification |                |                       |                    |                     |                 |                   | Mean abundance (%) |       | Log2-FoldChange | p-value |
|--------------------------|----------------|-----------------------|--------------------|---------------------|-----------------|-------------------|--------------------|-------|-----------------|---------|
| Kingdom                  | Phylum         | Class                 | Order              | Family              | Genus           | Species           | I                  | C     | I - C           |         |
| Bacteria                 | Proteobacteria | Gammaproteobacteria   | Aeromonadales      | Aeromonadaceae      | Tolomonas       | NA                | 0,198              | 0,038 | 0,780           | 0,008   |
| Bacteria                 | Bacteroidetes  | Bacteroidia           | Bacteroidales      | Prevotellaceae      | Prevotella_9    | NA                | 0,153              | 0,018 | 0,667           | 0,040   |
| Bacteria                 | Proteobacteria | Deltaproteobacteria   | Desulfovibrionales | Desulfovibrionaceae | Desulfovibrio   | desulfuricans     | 0,038              | 0,086 | -0,585          | 0,036   |
| Bacteria                 | Proteobacteria | Epsilonproteobacteria | Campylobacterales  | Campylobacteraceae  | Arcobacter      | NA                | 1,940              | 0,036 | 1,600           | 0,000   |
| Bacteria                 | Bacteroidetes  | Bacteroidia           | Bacteroidales      | Porphyromonadaceae  | Paludibacter    | NA                | 0,126              | 0,002 | 0,982           | 0,006   |
| Bacteria                 | Firmicutes     | Negativicutes         | Selenomonadales    | Veillonellaceae     | Selenomonas     | lacticifex        | 0,120              | 0,006 | 0,832           | 0,007   |
| Bacteria                 | Bacteroidetes  | Flavobacteriia        | Flavobacteriales   | Flavobacteriaceae   | Cloacibacterium | normanense        | 0,272              | 0,339 | -0,438          | 0,099   |
| Bacteria                 | Proteobacteria | Gammaproteobacteria   | Aeromonadales      | Aeromonadaceae      | Tolomonas       | NA                | 0,115              | 0,002 | 0,980           | 0,007   |
| Bacteria                 | Bacteroidetes  | Bacteroidia           | Bacteroidales      | Bacteroidaceae      | Bacteroides     | stercoris         | 0,074              | 0,002 | 0,835           | 0,036   |
| Bacteria                 | Bacteroidetes  | Bacteroidia           | Bacteroidales      | Prevotellaceae      | Prevotella_9    | NA                | 0,093              | 0,011 | 0,818           | 0,017   |
| Bacteria                 | Firmicutes     | Bacilli               | Lactobacillales    | Lactobacillaceae    | Lactobacillus   | delbrueckii       | 0,112              | 0,013 | 0,940           | 0,005   |
| Bacteria                 | Proteobacteria | Epsilonproteobacteria | Campylobacterales  | Campylobacteraceae  | Arcobacter      | aquimarinus       | 0,759              | 0,025 | 1,173           | 0,000   |
| Bacteria                 | Proteobacteria | Gammaproteobacteria   | Pseudomonadales    | Pseudomonadaceae    | Pseudomonas     | pseudoalcaligenes | 0,056              | 0,110 | -0,576          | 0,059   |
| Bacteria                 | Proteobacteria | Deltaproteobacteria   | Desulfovibrionales | Desulfovibrionaceae | Desulfovibrio   | intestinalis      | 0,010              | 0,022 | -0,751          | 0,058   |

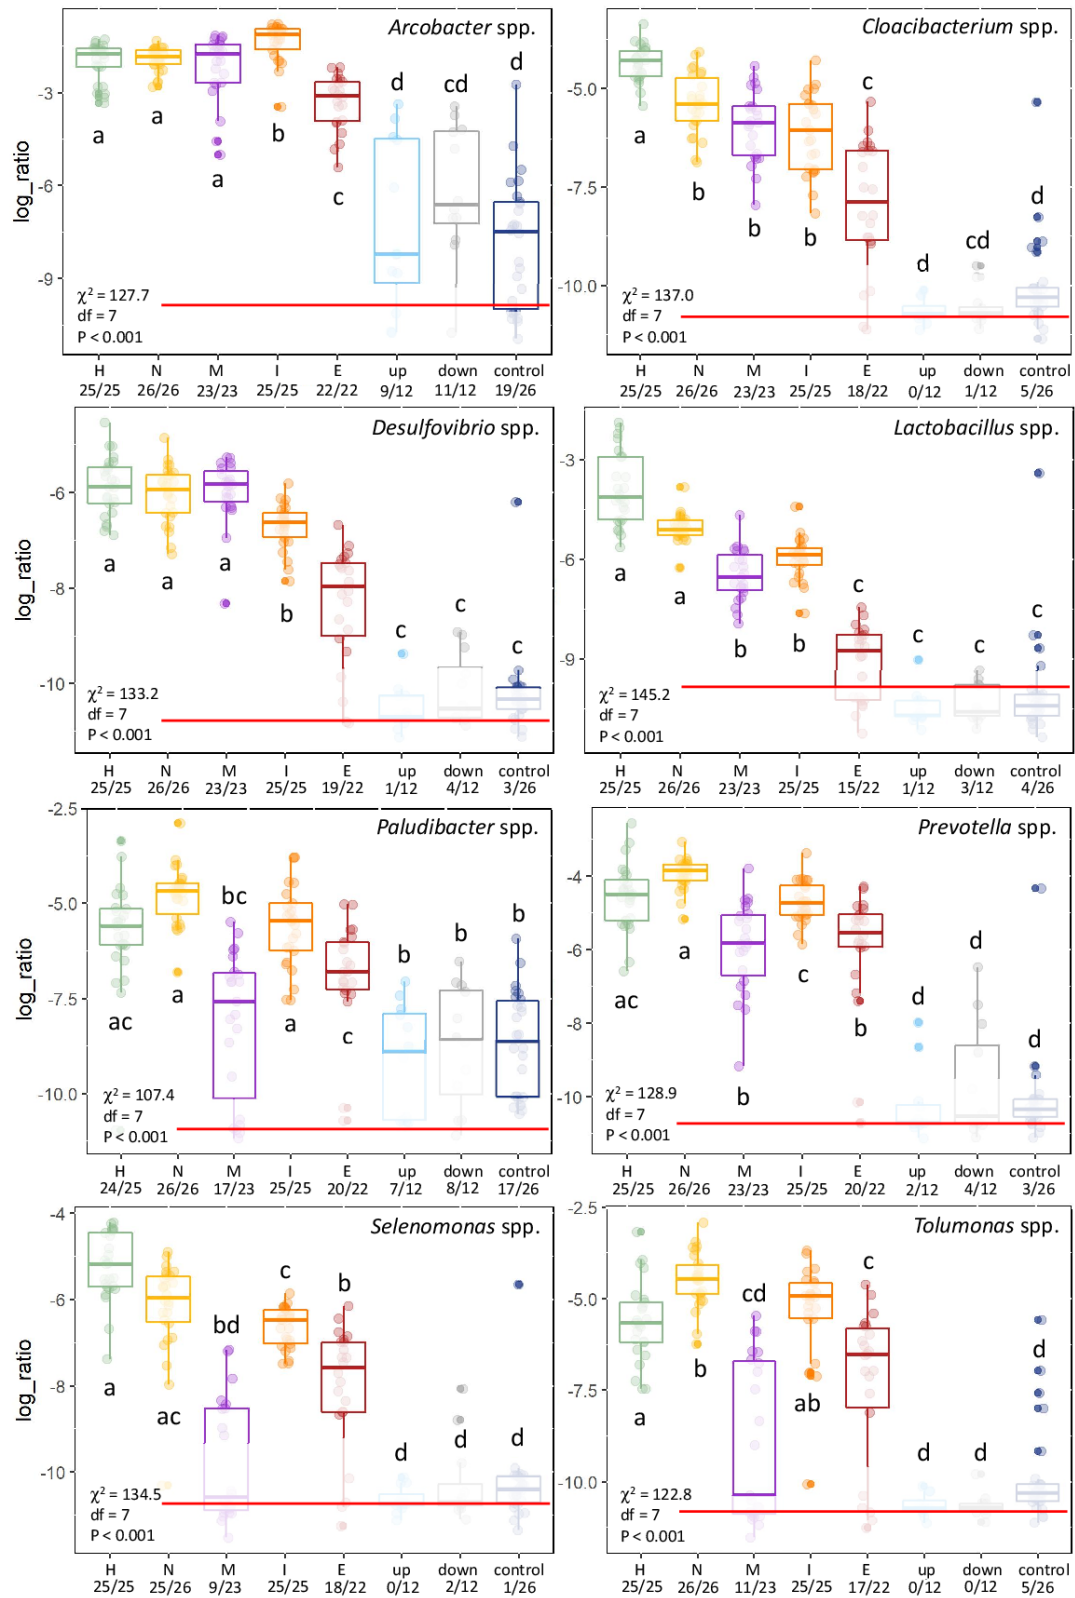

**Figure S4. Pathway of genera including clinical enriched genera.** Relative abundance of genera along the wastewater pathway. The Kruskal-Wallis statistics are shown on the left side of each panel, for all species there was significant difference in abundance observed between two or more locations. Group differences were assessed Dunn's test with P value adjustment method: BH. The red line represents the average detection limit. Samples below the detection limit are faded. H = hospital, N = nursing home, M = municipal, I = influent, E = effluent, up = upstream surface water, down = downstream surface water, and control = control surface water.

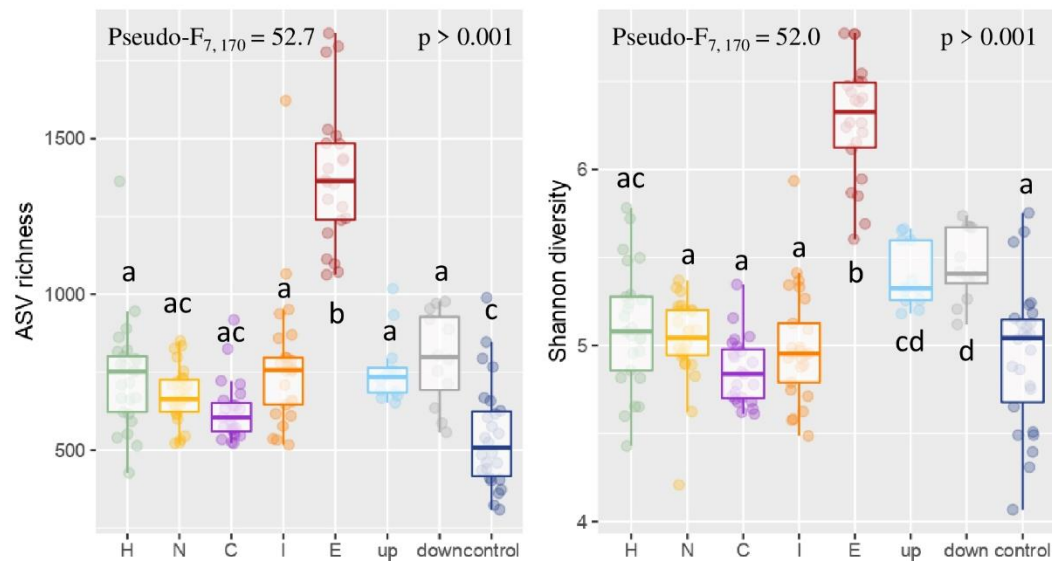

**Figure S5. ASV richness and Shannon diversity across all sites.** Both ASV richness (left) and Shannon diversity (right) show that effluent was the location with the highest diversity. Group differences were assessed by Tukey HSD. H = hospital, N = nursing home, C = community (municipal), I = influent, E = effluent, Up = upstream surface water, Down = downstream surface water, and Control = control surface water.
